# Supplementary material for: The Development of a Patient-Reported Outcome Measure for Assessment of Genital Psoriasis Symptoms: The Genital Psoriasis Symptoms Scale (GPSS)
Source: Springer Nature journal article supplement (doi:10.1007/s13555-017-0213-2), 2017-12-04
Supplement: MOESM1 [file 15277164]

## SUPPLEMENTAL MATERIALS

**Table S1. Search Strategy for Symptom Severity and Impact Measures**

| No. | Query                                                                                                                                                                                                                                                                                                                                                                                                                                                                                                                                                                                                                                                                                                                                                                                                                                                                                                                                        | Results        |
|-----|----------------------------------------------------------------------------------------------------------------------------------------------------------------------------------------------------------------------------------------------------------------------------------------------------------------------------------------------------------------------------------------------------------------------------------------------------------------------------------------------------------------------------------------------------------------------------------------------------------------------------------------------------------------------------------------------------------------------------------------------------------------------------------------------------------------------------------------------------------------------------------------------------------------------------------------------|----------------|
| #1  | 'psoriasis'/exp/mj OR psoriasis:ti                                                                                                                                                                                                                                                                                                                                                                                                                                                                                                                                                                                                                                                                                                                                                                                                                                                                                                           | <b>35439</b>   |
| #2  | 'genital psoriasis':ab,ti OR ('inverse psoriasis':ab,ti AND genital*:ab,ti) OR (vulva* NEAR/2 psoriasis) OR (vulva* NEAR/2 plaque) OR (labia NEAR/2 psoriasis) OR (perine* NEAR/2 psoriasis) OR (peni* NEAR/2 psoriasis) OR (peni* NEAR/2 plaque) OR (scrot* NEAR/2 psoriasis) OR (pubic NEAR/2 psoriasis) OR 'pubic psoriasis' OR ((genital NEAR/2 dermato*) AND psoriasis)                                                                                                                                                                                                                                                                                                                                                                                                                                                                                                                                                                 | <b>293</b>     |
| #3  | 'interview'/exp OR interview*:ab,ti OR 'questionnaire'/exp OR questionnaire*:ab,ti OR survey*:ab,ti OR 'rating scale'/exp OR (scale*:ab,ti NOT 'large scale':ab,ti) OR measure*:ab,ti OR 'measurement'/exp OR assessment*:ab,ti OR index*:ab,ti OR diar*:ab,ti OR inventor*:ab,ti OR score*:ab,ti OR profile:ab,ti OR profiles:ab,ti OR 'named inventories, questionnaires and rating scales'/exp OR 'quality of life'/exp OR 'quality of life' OR 'HRQOL':ab,ti OR hrqol:ab,ti OR qol:ab,ti OR 'life quality' OR 'well-being' OR 'wellbeing'/exp OR 'value of life' OR qualitative:ab,ti OR 'qualitative research'/exp OR patient* NEAR/1 assess* OR 'self evaluation' OR 'self evaluations' OR patient* NEAR/2 rating OR patient* NEAR/2 rated OR 'self-completed' OR 'self-administered' OR self NEAR/1 assessment* OR 'self-rated' OR 'patient based outcome' OR 'self evaluation'/exp OR experience*:ab,ti OR 'patient completed':ab,ti | <b>7469187</b> |
| #4  | ((psoriasis NEAR/3 severity):ab,ti AND symptom*:ab,ti) OR (symptom* NEAR/3 severity):ab,ti                                                                                                                                                                                                                                                                                                                                                                                                                                                                                                                                                                                                                                                                                                                                                                                                                                                   | <b>28698</b>   |
| #5  | #1 AND #3 AND #4 AND ([article]/lim OR [article in press]/lim OR [review]/lim) AND [english]/lim AND [2011-2015]/py                                                                                                                                                                                                                                                                                                                                                                                                                                                                                                                                                                                                                                                                                                                                                                                                                          | <b>51</b>      |
| #6  | #1 AND #3 AND #4 AND ([conference abstract]/lim OR [conference paper]/lim) AND [english]/lim AND [2012-2015]/py                                                                                                                                                                                                                                                                                                                                                                                                                                                                                                                                                                                                                                                                                                                                                                                                                              | <b>67</b>      |
| #7  | #2 AND #3 AND ([article]/lim OR [article in press]/lim OR [review]/lim) AND [english]/lim AND [2011-2015]/py                                                                                                                                                                                                                                                                                                                                                                                                                                                                                                                                                                                                                                                                                                                                                                                                                                 | <b>22</b>      |
| #8  | #2 AND #3 AND ([conference abstract]/lim OR [conference paper]/lim) AND [english]/lim AND [2012-2015]/py                                                                                                                                                                                                                                                                                                                                                                                                                                                                                                                                                                                                                                                                                                                                                                                                                                     | <b>22</b>      |
| #9  | #5 OR #7                                                                                                                                                                                                                                                                                                                                                                                                                                                                                                                                                                                                                                                                                                                                                                                                                                                                                                                                     | <b>73</b>      |
| #10 | #6 OR #8                                                                                                                                                                                                                                                                                                                                                                                                                                                                                                                                                                                                                                                                                                                                                                                                                                                                                                                                     | <b>87</b>      |
|     | Total                                                                                                                                                                                                                                                                                                                                                                                                                                                                                                                                                                                                                                                                                                                                                                                                                                                                                                                                        | <b>160</b>     |
